# Supplementary material for: Score for the Survival Probability in Metastasis Breast Cancer: A Nomogram-Based Risk Assessment Model
Source: PubMed Central journal article supplement — Cancer Res Treat. 2018 Jan 2;50(4):1260–9. doi: 10.4143/crt.2017.443 (PMC6192925; doi:10.4143/crt.2017.443), 2018-01-02
Supplement: crt-2017-443-suppl1.pdf [file crt-2017-443-suppl1.pdf]

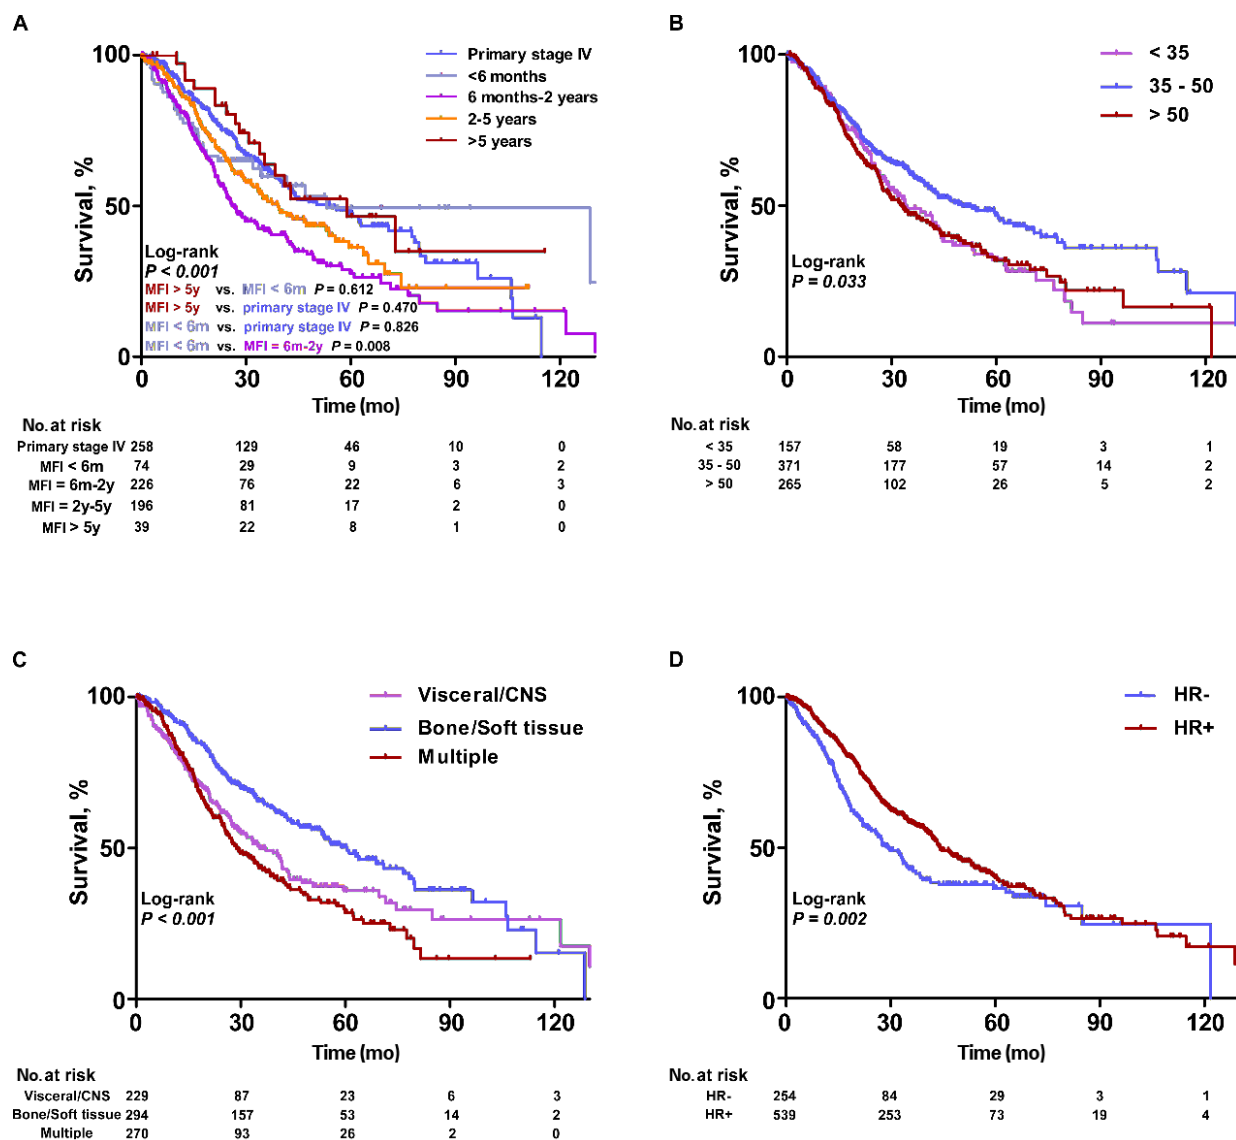

**S1 Fig.** Subgroup survival analysis in entire group of metastatic breast cancer (MBC) patients.

(A) Kaplan–Meier survival curves based on metastasis-free interval (MFI) showed that the median survival of MBC patients with primary stage IV disease, MFI < 6 months, MFI of 6 months-2 years, MFI of 2 years-5 years, and MFI > 5 years is 54.1, 53.2, 26.6, 39.3, and 58.8 months, respectively ( $p < 0.001$ , log-rank test). (B) Subgroup analysis based on age ( $p=0.033$ , log-rank test). (C) Subgroup analysis based on metastasis location ( $p < 0.001$ , log-rank test). (D) Subgroup analysis based on hormone receptor (HR) status ( $p=0.002$ , log-rank test). CNS, central nervous system.
