# Supplementary material for: Score for the Survival Probability in Metastasis Breast Cancer: A Nomogram-Based Risk Assessment Model
Source: PubMed Central journal article supplement — Cancer Res Treat. 2018 Jan 2;50(4):1260–9. doi: 10.4143/crt.2017.443 (PMC6192925; doi:10.4143/crt.2017.443), 2018-01-02
Supplement: crt-2017-443-suppl2.pdf [file crt-2017-443-suppl2.pdf]

**S2 Table.** Univariable and multivariable Cox regression model in metastatic breast cancer (entire cohort)

| Characteristic                | Univariable   |             |         | Multivariable               |             |         |
|-------------------------------|---------------|-------------|---------|-----------------------------|-------------|---------|
|                               | hazard ratios | 95% CI      | p-value | hazard ratios <sup>a)</sup> | 95% CI      | p-value |
| <b>Age (yr)</b>               |               |             | 0.003   |                             |             | 0.103   |
| <35                           | 1             |             |         | 1                           |             |         |
| 35-50                         | 0.714         | 0.551-0.925 | 0.011   | 0.759                       | 0.571-1.008 | 0.057   |
| >50                           | 1.009         | 0.775-1.313 | 0.948   | 0.966                       | 0.616-1.514 | 0.879   |
| <b>Menopause status</b>       |               |             |         |                             |             |         |
| Menopause vs. menses          | 1.182         | 0.963-1.450 | 0.11    | 1.036                       | 0.702-1.528 | 0.86    |
| <b>Tumour size (cm)</b>       |               |             | 0.031   |                             |             | 0.141   |
| ≤ 2                           | 1             |             |         | 1                           |             |         |
| > 2 and ≤ 5                   | 1.442         | 1.096-1.898 | 0.009   | 1.329                       | 0.998-1.770 | 0.051   |
| > 5                           | 1.251         | 0.916-1.709 | 0.159   | 1.291                       | 0.927-1.799 | 0.13    |
| <b>Lymph node involvement</b> |               |             |         |                             |             |         |
| Yes vs. no                    | 1.213         | 0.952-1.546 | 0.118   | 1.2                         | 0.909-1.583 | 0.198   |
| <b>MFI</b>                    |               |             | <0.001  |                             |             | <0.001  |
| Primary stage IV              | 1             |             |         | 1                           |             |         |
| < 6 mo                        | 0.98          | 0.654-1.468 | 0.921   | 1.125                       | 0.717-1.765 | 0.607   |
| 6 mo-2 yr                     | 1.698         | 1.327-2.173 | <0.001  | 1.851                       | 1.391-2.463 | <0.001  |
| 2-5 yr                        | 1.29          | 0.987-1.687 | 0.063   | 1.331                       | 0.985-1.798 | 0.063   |
| > 5 yr                        | 0.858         | 0.516-1.427 | 0.556   | 0.836                       | 0.450-1.553 | 0.571   |
| <b>No. of metastases</b>      |               |             |         |                             |             |         |
| > 1 vs. 1                     | 1.458         | 1.196-1.777 | <0.001  | 1.137                       | 0.718-1.801 | 0.584   |
| <b>Metastasis site</b>        |               |             | <0.001  |                             |             | 0.068   |
| Visceral/CNS                  | 1             |             |         | 1                           |             |         |
| Bone/Soft tissue              | 0.651         | 0.507-0.837 | 0.001   | 0.76                        | 0.569-1.016 | 0.064   |

|                             |       |             |       |       |             |       |
|-----------------------------|-------|-------------|-------|-------|-------------|-------|
| Multiple                    | 1.197 | 0.941-1.521 | 0.142 | 1.157 | 0.696-1.923 | 0.575 |
| <b>HR status</b>            |       |             |       |       |             |       |
| HR+ vs. HR-                 | 0.716 | 0.581-0.881 | 0.002 | 0.675 | 0.530-0.861 | 0.002 |
| <b>HER2 receptor status</b> |       |             | 0.882 |       |             | 0.382 |
| Non-amplification           | 1     |             |       | 1     |             |       |
| Amplification               | 0.997 | 0.806-1.234 | 0.978 | 0.847 | 0.663-1.083 | 0.185 |
| Not known or equivocal (2+) | 1.097 | 0.754-1.597 | 0.627 | 1.031 | 0.673-1.580 | 0.889 |

---

CI, confidence interval; MFI, metastasis-free interval; CNS, central nervous system; HR, hormone receptor; HER2, human epidermal growth factor receptor 2. <sup>a)</sup>Co-variables for multivariable adjustment: age, menopause status, tumour size, lymph node involvement, MFI, number of metastasis, location of metastasis site, HR status and HER2 receptor status.
