# Supplementary material for: Score for the Survival Probability in Metastasis Breast Cancer: A Nomogram-Based Risk Assessment Model
Source: PubMed Central journal article supplement — Cancer Res Treat. 2018 Jan 2;50(4):1260–9. doi: 10.4143/crt.2017.443 (PMC6192925; doi:10.4143/crt.2017.443), 2018-01-02
Supplement: crt-2017-443-suppl3.pdf [file crt-2017-443-suppl3.pdf]

**S3 Table.** Variance inflation factor

| Variable                | VIF   |
|-------------------------|-------|
| <b>Age (yr)</b>         |       |
| < 35                    | NA    |
| 35-50                   | 1.668 |
| > 50                    | 1.673 |
| <b>Primary stage IV</b> |       |
| MFI < 6 mo              | 1.185 |
| MFI of 6 mo-2 yr        | 1.564 |
| MFI of 2-5 yr           | 1.419 |
| MFI > 5 yr              | 1.154 |
| <b>Metastasis</b>       |       |
| Visceral/CNS            | NA    |
| Bone/Soft tissue        | 1.447 |
| Multiple                | 1.421 |
| <b>HR status</b>        |       |
| HR-                     | NA    |
| HR+                     | 1.042 |

VIF, variance inflation factor; NA, not available; MFI, metastasis-free interval; CNS, central nervous system; HR, hormone receptor.
