# Supplementary material for: Score for the Survival Probability in Metastasis Breast Cancer: A Nomogram-Based Risk Assessment Model
Source: PubMed Central journal article supplement — Cancer Res Treat. 2018 Jan 2;50(4):1260–9. doi: 10.4143/crt.2017.443 (PMC6192925; doi:10.4143/crt.2017.443), 2018-01-02
Supplement: crt-2017-443-suppl4.pdf [file crt-2017-443-suppl4.pdf]

**S4 Table.** Proportional hazards test

| Variable                | rho    | Chisq  | p-value |
|-------------------------|--------|--------|---------|
| <b>Age</b>              |        |        |         |
| < 35                    | NA     | NA     | NA      |
| 35-50                   | -0.045 | 0.753  | 0.385   |
| > 50                    | -0.033 | 0.395  | 0.53    |
| <b>Primary stage IV</b> | NA     | NA     | NA      |
| <b>MFI</b>              |        |        |         |
| < 6 mo                  | -0.016 | 1.876  | 0.103   |
| 6 mo-2 yr               | -0.067 | 1.642  | 0.2     |
| 2-5 yr                  | -0.055 | 1.05   | 0.306   |
| > 5 yr                  | 0.022  | 0.177  | 0.674   |
| <b>Metastasis</b>       |        |        |         |
| Visceral/CNS            | NA     | NA     | NA      |
| Bone/Soft tissue        | 0.108  | 2.862  | 0.119   |
| Multiple                | 0.079  | 2.221  | 0.136   |
| <b>HR status</b>        |        |        |         |
| HR-                     | NA     | NA     | NA      |
| HR+                     | 0.114  | 1.539  | 0.101   |
| <b>GLOBAL</b>           | NA     | 11.515 | 0.235   |

NA, not available; MFI, metastasis-free interval; CNS, central nervous system; HR, hormone receptor.
